# Supplementary material for: Familial and Genetic Influences on the Common Pediatric Primary Pain Disorders: A Twin Family Study
Source: PubMed Central journal article supplement (PMC7911833; doi:10.3390/children8020089), 2021-01-28
Supplement: children-08-00089-s001.pdf [file children-08-00089-s001.pdf]

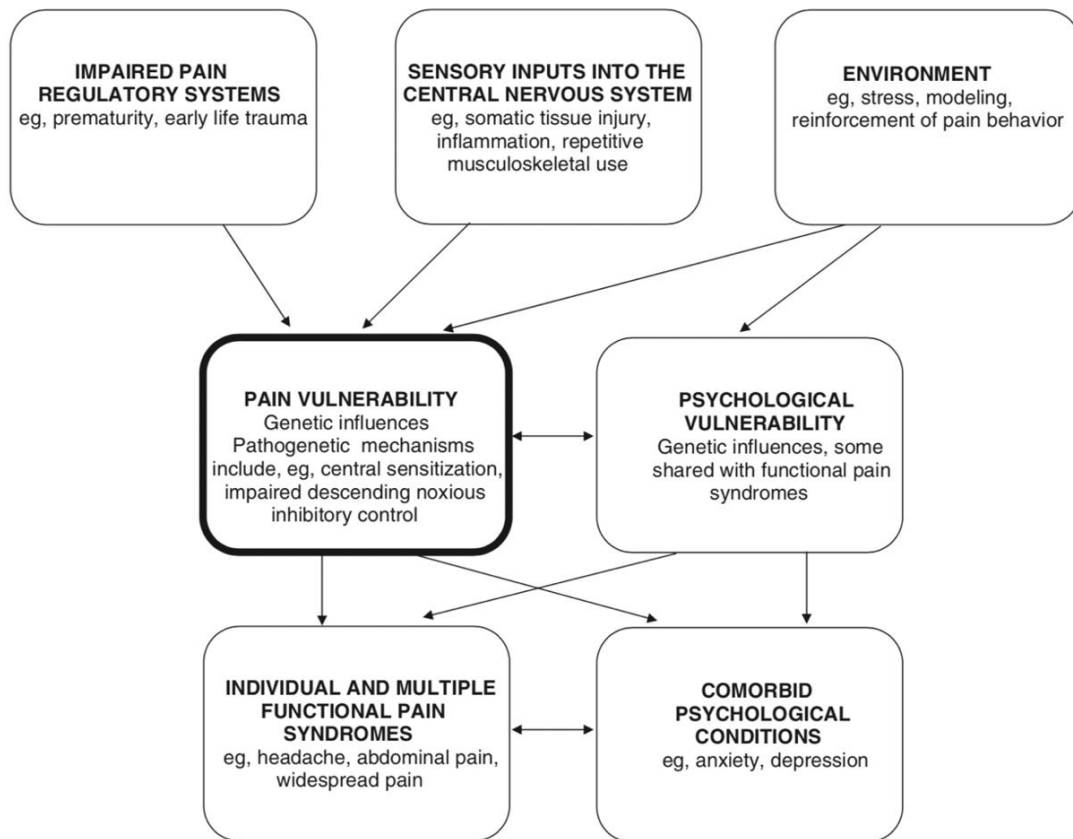

**Figure S1.** Key constructs discussed in the commentary, showing hypothesized antecedents and consequences of pain vulnerability. Reprinted with permission from ref. [80]. Copyright 2011 Oxford University Press.
